# Supplementary material
Source: publisher site journal article supplement (https://neobiota.pensoft.net/article/33118/download/suppl/31/)
Supplement: Supplementary file 1

## Supplementary information

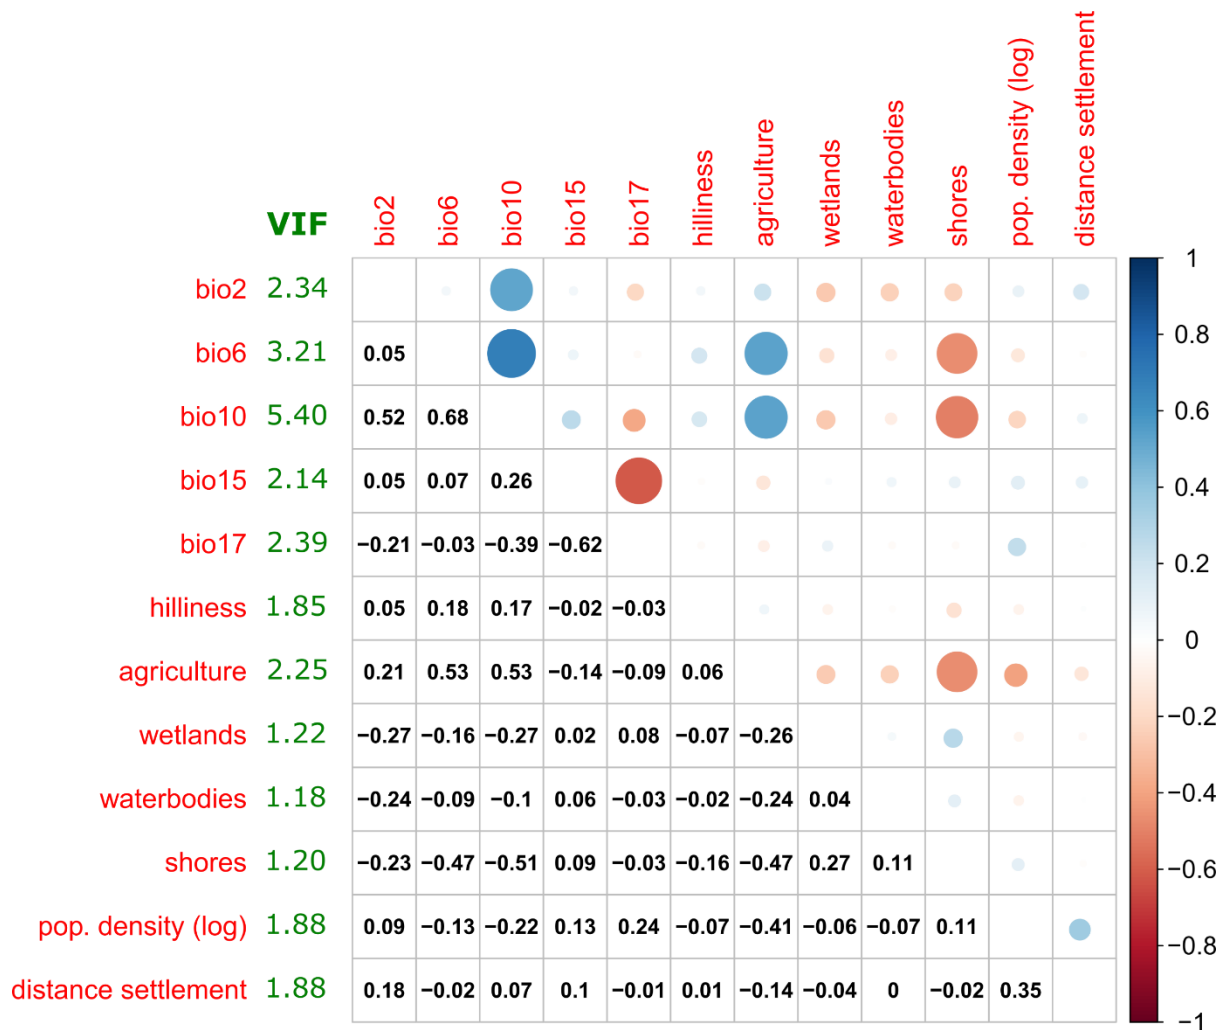

**Figure S1. Pairwise Pearson's correlation coefficients for predictor variables.** VIF values for the variables are given in green. The following candidate variables were excluded from the analysis due to high correlation: mean altitude, artificial surfaces, forest and semi-natural areas, bio1 (mean annual temperature), bio3 (isothermality), bio4 (temperature seasonality), bio5 (max temperature of warmest month), bio7 (temperature annual range), bio8 (mean temperature of wettest quarter), bio9 (mean temperature of driest quarter), bio11 (mean temperature of coldest quarter), bio12 (mean annual precipitation), bio13 (precipitation of wettest month), bio14 (precipitation of driest month), bio16 (precipitation of wettest quarter), bio18 (precipitation of warmest quarter), bio19 (precipitation of coldest quarter).

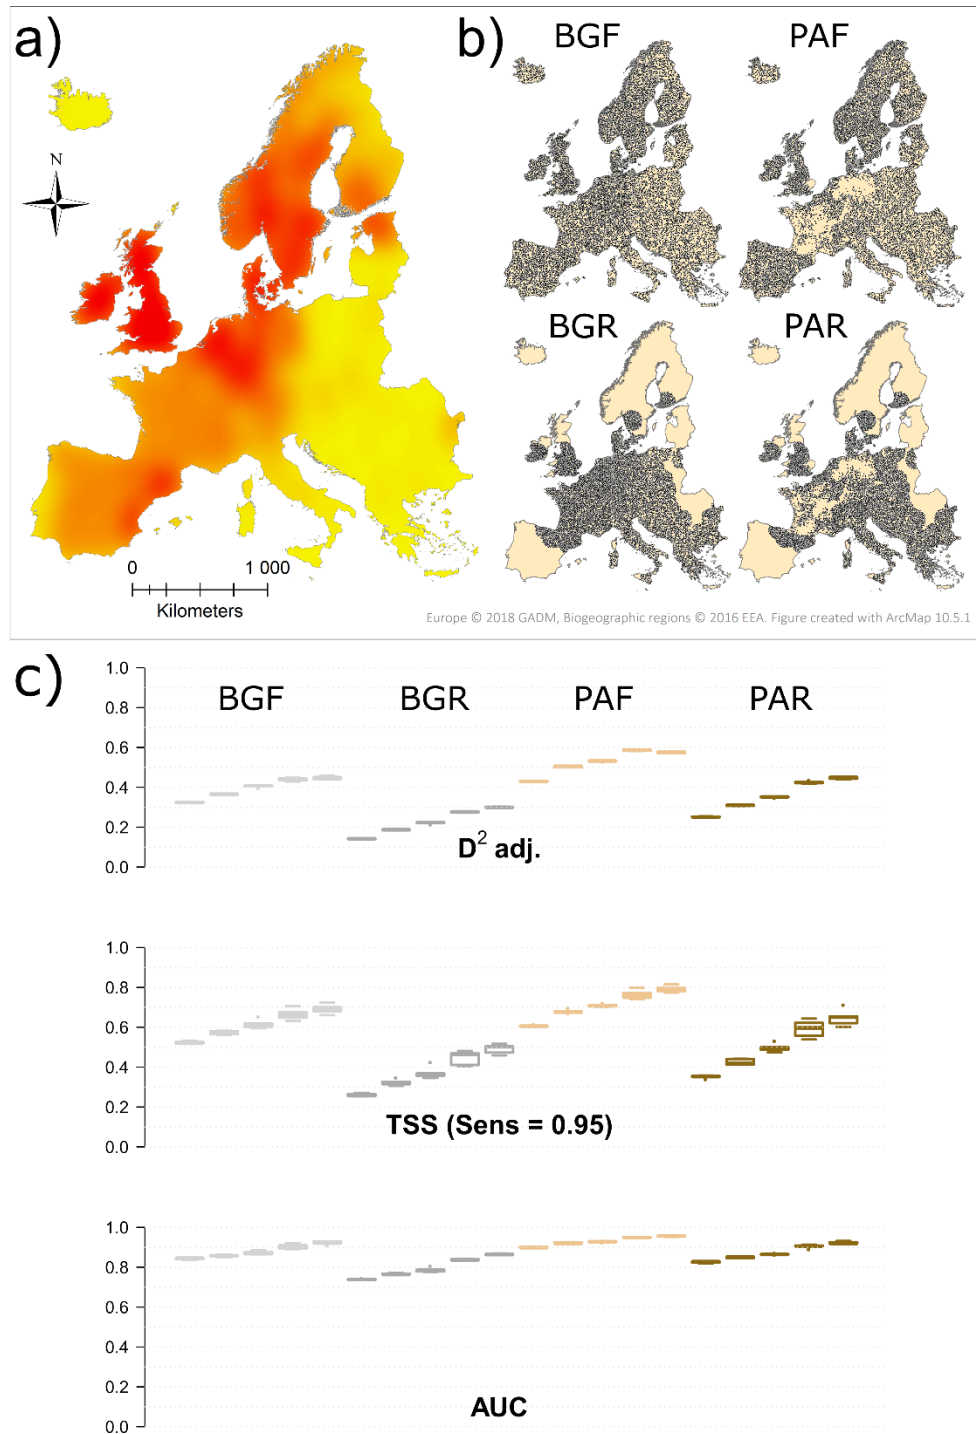

**Figure S2. Absence sampling strategies.** a) Bias file, i.e. a probability density surface derived from presences of comparable species deposited on GBIF. Red colours indicate high and yellow colours low sampling intensity. b) Sampling schemes of the four examined versions of generated absences: BGF = background (i.e. sampling within all grid cells) full extent and BGR = background restricted extent, PAF = pseudo-absences (i.e. sampling only within non-presence grid cells) full extent and PAR = pseudo-absences restricted extent (i.e. 150 km buffer around coyppu occurrences) c) Model evaluation ( $D^2$ , TSS, AUC) by means of the results of a fivefold cross-validation per persistence level and absence design. Pseudo-absences across the full extent of our study area (PAF) performed best and consequently were chosen for further analysis.

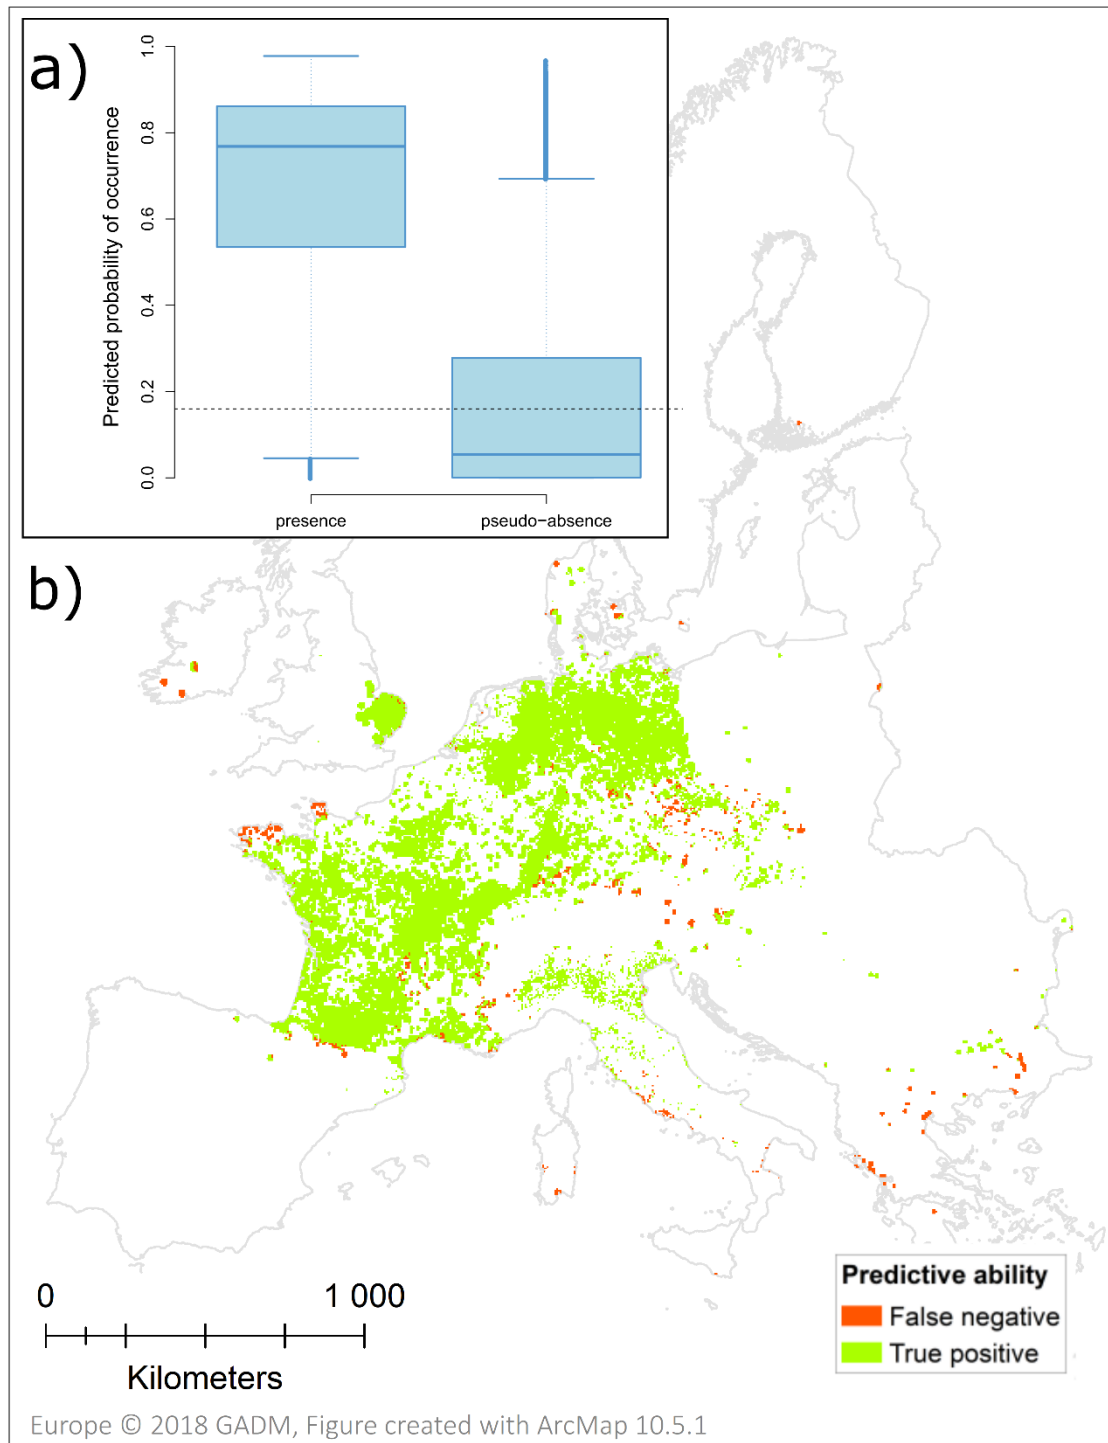

**Figure S3. Predictive ability of the consensus prediction under current climatic conditions (1979 - 2013).** a) Boxplot showing the distribution of the predicted probabilities of occurrence for presence and pseudo-absence grid cells. Medians of predicted probability of occurrence are 0.05 and 0.77, for pseudo-absence and presence, respectively. b) Spatial patterns of omission errors (1309 grid cells; in red) and true positives (24225 grid cells; in green).

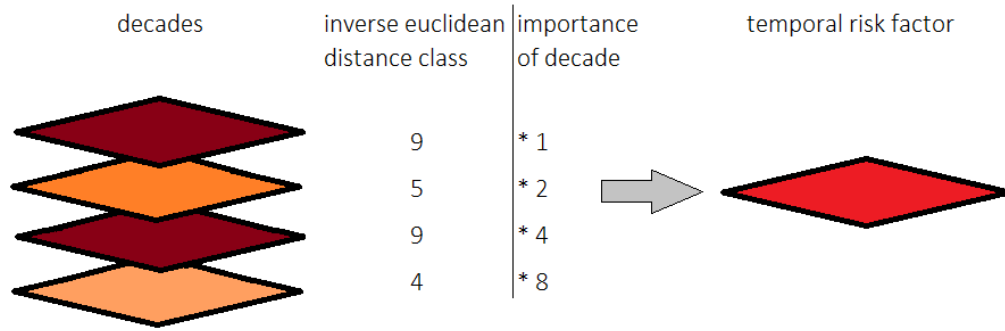

**Figure S4. Calculation of the weighting factor for the coypu invasion risk map.** The inverse Euclidean distance to the nearest grid cell with coypu presence (max. distance 150 km) was calculated for each grid cell for each decade (1980–1989; 1990–1999; 2000–2009; 2010–2018) and consequently divided in classes from 10 (close) to 1 (very distant). The resulting values have been weighted, according to the increasing importance of the decade ( $x \text{ decade} = 2 \times \text{former decade}$ , starting with 1 for 1980–1989) and summed up for each cell (see example above). Further, the matrix was scaled from 0 to 100 by dividing each grid cell value by the maximum value of the matrix and multiplying with 100. The risk map was derived as follows: probability of occurrence [%] \* spatiotemporal risk factor.

**Table S1. Presence data sources included in this study, listed by country and the total number of records per country after data cleaning. The downloaded GBIF data comprises 26 datasets (shown in parentheses) and was partly overlapping with other primary or secondary sources, from where data has been requested.**

| <i>Country</i>        | <i>Sources</i>                                                                                                                                                                                                                                                                                                                                 | <i>#</i>   |
|-----------------------|------------------------------------------------------------------------------------------------------------------------------------------------------------------------------------------------------------------------------------------------------------------------------------------------------------------------------------------------|------------|
| <i>Albania</i>        | Bego et al. (2018)                                                                                                                                                                                                                                                                                                                             | 7          |
| <i>Austria</i>        | NHM Vienna; <i>Biologiezentrum Linz</i> (J. Plass); <i>Haus der Natur</i> (Salzburg); inatura Dornbirn; iNaturalist; Hunting authorities Burgenland, Styria and Vorarlberg; Burgenland Provincial Government Dep. for Nature Conservation; Spitzenberger (2001); Spitzenberger et al. (1996); GBIF (naturgucker, anymals.org); beaver officers | 134        |
| <i>Belgium</i>        | Natuurpunt Studie/Waarnemingen.be (website for nature information of Natuurpunt and Stichting Natuurinformatie); Natagora; iNaturalist; GBIF (RBINS DaRWIn, Natuurpunt)                                                                                                                                                                        | 326        |
| <i>Bulgaria</i>       | ESENIAS project (unpublished, Dragoev 1978; Gabrashanski et al. 1980, Gruychev 2012), Gruychev (2017), Peshev et al. (2004)                                                                                                                                                                                                                    | 101        |
| <i>Croatia</i>        | ESENIAS project (CAEN 2017); Purger & Kristufek (1991)                                                                                                                                                                                                                                                                                         | 7          |
| <i>Czech Republic</i> | Anděra (2011); Anděra M. (personal communication); GBIF (iNaturalist, naturgucker); iNaturalist                                                                                                                                                                                                                                                | 819        |
| <i>Denmark</i>        | Danish Environmental Protection Agency; Fugle og Natur; Danish Hunting Statistics; GBIF (Atlas of Danish Mammals)                                                                                                                                                                                                                              | 32         |
| <i>Finland</i>        | Finnish Invasive Alien Species Portal ( <a href="http://www.vieraslaajit.fi/">http://www.vieraslaajit.fi/</a> )                                                                                                                                                                                                                                | 1          |
| <i>France</i>         | MNHN, GBIF (IASTracker, iNaturalist, MHNG, naturgucker), iNaturalist                                                                                                                                                                                                                                                                           | 10,25<br>5 |
| <i>Germany</i>        | Arnold, Greiser, Krüger, & Martin, (2016) & DJV (Deutscher Jagdverband); DVWK (1997); GBIF (iNaturalist, anymals.org, naturgucker, Artenfinder, „GEO-Tag der Artenvielfalt“, MNHNL); Heidecke et al. 2001 and Heidecke (2009) in Scheide (2013); iNaturalist                                                                                   | 6,702      |
| <i>Greek</i>          | ESENIAS project (Adamopoulou & Legakis 2016); iNaturalist                                                                                                                                                                                                                                                                                      | 49         |

|                        |                                                                                                                                                                                                                      |               |
|------------------------|----------------------------------------------------------------------------------------------------------------------------------------------------------------------------------------------------------------------|---------------|
| <i>Hungary</i>         | Department of Nature Conservation of Ministry of Agriculture; Fertő Hanság Nationalpark; iNaturalist                                                                                                                 | 36            |
| <i>Ireland</i>         | GBIF (National IAS Database)                                                                                                                                                                                         | 4             |
| <i>Italy</i>           | Ornitho.it; Italian Mammal Society (ATIt); GBIF (iNaturalist, naturgucker); iNaturalist                                                                                                                              | 3,058         |
| <i>Luxembourg</i>      | MNHNL                                                                                                                                                                                                                | 9             |
| <i>Macedonia</i>       | Purger & Kristufek (1991)                                                                                                                                                                                            | 3             |
| <i>Montenegro</i>      | Purger & Kristufek (1991)                                                                                                                                                                                            | 1             |
| <i>Netherlands</i>     | NDFF, Zoogdiervereniging; GBIF (naturgucker); iNaturalist                                                                                                                                                            | 1,945         |
| <i>Poland</i>          | Institute of Nature Conservation PAS, GBIF (Mammal Research Institute PAS, Institute of Nature Conservation PAS)                                                                                                     | 7             |
| <i>Romania</i>         | ESENIAS project (Murariu and Chişamera 2004)                                                                                                                                                                         | 5             |
| <i>Serbia</i>          | Purger & Kristufek (1991), iNaturalist                                                                                                                                                                               | 3             |
| <i>Slovakia</i>        | State Nature Protection SR; Administration of Protected Landscape Area Ponitrie                                                                                                                                      | 19            |
| <i>Slovenia</i>        | Bioportal ( <a href="http://www.bioportal.si">www.bioportal.si</a> ); Purger & Kristufek (1991); iNaturalist                                                                                                         | 29            |
| <i>Spain</i>           | Herrero & Couto (2002); Salsamendi, Latierro, & O'Brien (2010); GBIF (Ministry of Agriculture, Food and Environment; naturgucker, ornithon.cat); <a href="http://www.diariovasco.com">http://www.diariovasco.com</a> | 80            |
| <i>Sweden</i>          | GBIF (Artportalen)                                                                                                                                                                                                   | 1             |
| <i>Switzerland</i>     | Info fauna Centre Suisse de Cartographie de la Faune (CSCF); iNaturalist; GBIF (MHNG, naturgucker)                                                                                                                   | 54            |
| <i>Turkey</i>          | ESENIAS project (Özkan 1999)                                                                                                                                                                                         | 14            |
| <i>United Kingdom</i>  | GBIF (Atlas of Mammals (1993), NBIS, SBIS)                                                                                                                                                                           | 531           |
| <b><i>In total</i></b> |                                                                                                                                                                                                                      | <b>24,232</b> |

**Table S2. Top models ( $\Delta AIC < 4$ ) that have been used for averaging within the persistence levels and their according weight. Only water bodies and shores were repeatedly removed from top models.**

|          | poly(bio02, 2) | poly(bio06, 2) | poly(bio10, 2) | poly(bio15, 2) | poly(bio17, 2) | poly(hilliness, 2) | poly(popgrid, 2) | poly(dist, 2) | poly(agriculture, 2) | poly(wetlands, 2) | poly(waterbodies, 2) | poly(shores, 2) | $\Delta AICc$ | weight |
|----------|----------------|----------------|----------------|----------------|----------------|--------------------|------------------|---------------|----------------------|-------------------|----------------------|-----------------|---------------|--------|
| all      | +              | +              | +              | +              | +              | +                  | +                | +             | +                    | +                 | +                    | +               |               | 0.67   |
|          | +              | +              | +              | +              | +              | +                  | +                | +             | +                    | +                 | X                    | +               | 1.43          | 0.33   |
| multiple | +              | +              | +              | +              | +              | +                  | +                | +             | +                    | +                 | +                    | X               |               | 0.78   |
|          | +              | +              | +              | +              | +              | +                  | +                | +             | +                    | +                 | +                    | +               | 2.59          | 0.22   |
| one GL   | +              | +              | +              | +              | +              | +                  | +                | +             | +                    | +                 | +                    | X               |               | 0.54   |
|          | +              | +              | +              | +              | +              | +                  | +                | +             | +                    | +                 | X                    | X               | 0.71          | 0.38   |
|          | +              | +              | +              | +              | +              | +                  | +                | +             | +                    | +                 | +                    | +               | 4             | 0.07   |
| two GL   | +              | +              | +              | +              | +              | +                  | +                | +             | +                    | +                 | +                    | X               |               | 0.7    |
|          | +              | +              | +              | +              | +              | +                  | +                | +             | +                    | +                 | +                    | +               | 1.67          | 0.3    |
|          | +              | +              | +              | +              | +              | +                  | +                | +             | +                    | +                 | X                    | X               |               | 0.4    |
| establ   | +              | +              | +              | +              | +              | +                  | +                | +             | +                    | +                 | X                    | +               | 0.11          | 0.38   |
|          | +              | +              | +              | +              | +              | +                  | +                | +             | +                    | +                 | +                    | X               | 2.23          | 0.13   |
|          | +              | +              | +              | +              | +              | +                  | +                | +             | +                    | +                 | +                    | +               | 2.8           | 0.1    |
